# Supplementary material for: DFT study of dihydrogen addition to molybdenum π-heteroaromatic complexes: a prerequisite step for the catalytic hydrodenitrogenation process
Source: Royal Society of Chemistry journal article supplement (doi:10.1039/c5nj01585e), 2015-01-01
Supplement: c5nj01585e1.pdf [file c5nj01585e1.pdf]

## SUPPLEMENTARY INFORMATION

### DFT Study of Dihydrogen Addition to Molybdenum $\pi$ -Heteroaromatic Complexes: Prerequisite Step for the Catalytic Hydrodenitrogenation Process

*Evgenii O. Fetisov, Igor P. Gloriov, Denis A. Kissounko, Mikhail S. Nechaev,  
Samia Kahlal, Jean-Yves Saillard, Yuri F. Oprunenko*

**Table of the cartesian coordinates of all the stationary points considered in the  
manuscript (see Table 1 and Scheme 1)**

59

XYZ file for : **1-N**

|    |             |             |             |
|----|-------------|-------------|-------------|
| 6  | -1.10044515 | 1.24749969  | 2.31515411  |
| 6  | -1.52266964 | -0.07230418 | 2.62337506  |
| 6  | -0.52558432 | -1.09596215 | 2.71075883  |
| 7  | 0.83040540  | -0.87028103 | 2.67165006  |
| 6  | 1.23521765  | 0.46327405  | 2.57240533  |
| 6  | 0.30749644  | 1.56950441  | 2.41169198  |
| 1  | -2.57969397 | -0.32382503 | 2.70469142  |
| 1  | -0.81938600 | -2.13169961 | 2.89676168  |
| 1  | -1.82970121 | 2.05472584  | 2.22051905  |
| 42 | -0.20249105 | -0.10624818 | 0.72709220  |
| 15 | -1.32817262 | 1.31794066  | -0.89371107 |
| 15 | -1.30465293 | -2.06092864 | -0.16779269 |
| 15 | 1.75420247  | -0.46334338 | -0.73212656 |
| 6  | -0.36066098 | -3.67287567 | 0.03123712  |
| 6  | -2.91703018 | -2.57267361 | 0.64666656  |
| 6  | -1.86286406 | -2.30071441 | -1.94738467 |
| 6  | -1.02955414 | 3.16686522  | -0.73336707 |
| 6  | -1.13560353 | 1.23011751  | -2.76428096 |
| 6  | -3.20229898 | 1.33975267  | -0.80977121 |
| 1  | -3.29514826 | -3.51285705 | 0.21758572  |
| 1  | -2.76853291 | -2.71052275 | 1.72572724  |
| 1  | -3.66406136 | -1.78087135 | 0.49915134  |
| 1  | -0.97859407 | -4.54364987 | -0.23669950 |
| 1  | 0.53053181  | -3.65681904 | -0.61131317 |
| 1  | -0.02304881 | -3.76271856 | 1.07262851  |

|   |             |             |             |
|---|-------------|-------------|-------------|
| 1 | -2.27272945 | -3.31203889 | -2.09233364 |
| 1 | -2.64256922 | -1.56685714 | -2.19356020 |
| 1 | -1.01851583 | -2.15420641 | -2.63271271 |
| 1 | -3.62969359 | 2.11129341  | -1.46885816 |
| 1 | -3.59695470 | 0.35732553  | -1.10255489 |
| 1 | -3.50828059 | 1.53357317  | 0.22736872  |
| 1 | -1.57627356 | 3.72853080  | -1.50611731 |
| 1 | -1.36045733 | 3.50699434  | 0.25647290  |
| 1 | 0.04561377  | 3.37257396  | -0.82271542 |
| 1 | -1.80005685 | 1.95211520  | -3.26348091 |
| 1 | -0.09633755 | 1.46890278  | -3.03119525 |
| 1 | -1.36369626 | 0.22039244  | -3.12729581 |
| 6 | 3.10708670  | -1.54311529 | -0.02491989 |
| 6 | 1.71221829  | -1.20966863 | -2.45599522 |
| 6 | 2.72425832  | 1.08705465  | -1.11773219 |
| 1 | 2.71801900  | -1.20935128 | -2.90360098 |
| 1 | 1.35371702  | -2.24699198 | -2.40165120 |
| 1 | 1.03075476  | -0.63906428 | -3.09967916 |
| 1 | 3.65883246  | 0.85122786  | -1.64942203 |
| 1 | 2.11208448  | 1.75380929  | -1.74077064 |
| 1 | 2.95337973  | 1.60674299  | -0.17786428 |
| 1 | 3.97342635  | -1.58704841 | -0.70239469 |
| 1 | 3.41526848  | -1.14265633 | 0.94745072  |
| 1 | 2.71354682  | -2.55534957 | 0.13661311  |
| 6 | 2.62610565  | 0.76953504  | 2.71142296  |
| 6 | 3.08452758  | 2.07235890  | 2.65839574  |
| 1 | 3.30489063  | -0.06126935 | 2.91044005  |
| 1 | 4.15008714  | 2.27624153  | 2.78190518  |
| 6 | 2.18137543  | 3.14835040  | 2.45584406  |
| 1 | 2.55275039  | 4.17318321  | 2.41141971  |
| 6 | 0.82649507  | 2.89371092  | 2.32996399  |
| 1 | 0.12240152  | 3.72133292  | 2.21404216  |
| 1 | 0.41863983  | -2.79484795 | -6.09093962 |
| 1 | 0.53018341  | -2.41253872 | -5.45314049 |

59

XYZ file for : **TS1-N**

|   |             |             |            |
|---|-------------|-------------|------------|
| 6 | -0.71676125 | 1.10019137  | 1.63279218 |
| 6 | -1.32439221 | -0.13304942 | 2.08239147 |
| 6 | -0.41492084 | -1.21507327 | 2.27835834 |
| 7 | 0.95289402  | -1.04342679 | 2.13269461 |
| 6 | 1.43124392  | 0.25984724  | 2.44277158 |
| 6 | 0.61502281  | 1.40077141  | 2.19459880 |
| 1 | -2.39699269 | -0.24515666 | 2.23740837 |
| 1 | -0.76287855 | -2.21093320 | 2.56830456 |
| 1 | -1.37065261 | 1.95765205  | 1.44617195 |

|    |             |             |             |
|----|-------------|-------------|-------------|
| 42 | -0.18317726 | -0.50500994 | 0.18626944  |
| 15 | -1.37159206 | 0.86964546  | -1.41911770 |
| 15 | -1.77857686 | -2.27852852 | -0.24273718 |
| 15 | 2.07614905  | 0.11697627  | -1.02694064 |
| 6  | -1.07359965 | -3.99617907 | 0.04960433  |
| 6  | -3.31410656 | -2.41553681 | 0.82158911  |
| 6  | -2.59312575 | -2.61466822 | -1.90000342 |
| 6  | -0.74924353 | 2.63745757  | -1.57562207 |
| 6  | -1.57627527 | 0.55213418  | -3.26671098 |
| 6  | -3.16881703 | 1.25053751  | -1.02246546 |
| 1  | -3.88696703 | -3.31183138 | 0.54215810  |
| 1  | -3.04055746 | -2.48675592 | 1.88230952  |
| 1  | -3.94268904 | -1.52587366 | 0.68227553  |
| 1  | -1.86643217 | -4.75769560 | 0.00100630  |
| 1  | -0.31486154 | -4.21760736 | -0.71216081 |
| 1  | -0.58774555 | -4.03108291 | 1.03368598  |
| 1  | -3.15545173 | -3.56017227 | -1.86746813 |
| 1  | -3.28629730 | -1.80123523 | -2.15206579 |
| 1  | -1.82413556 | -2.67741466 | -2.68139779 |
| 1  | -3.58916583 | 2.00147218  | -1.70881332 |
| 1  | -3.76309536 | 0.32915481  | -1.09432996 |
| 1  | -3.24138242 | 1.62171570  | 0.00906414  |
| 1  | -1.45252095 | 3.25973431  | -2.14954454 |
| 1  | -0.60462698 | 3.07065209  | -0.57736108 |
| 1  | 0.21988108  | 2.63657188  | -2.09344186 |
| 1  | -2.10782857 | 1.38225010  | -3.75840274 |
| 1  | -0.58448217 | 0.43872434  | -3.72504070 |
| 1  | -2.13287520 | -0.37758894 | -3.43565492 |
| 6  | 3.44338981  | -1.05232120 | -0.54151381 |
| 6  | 2.28488078  | 0.11361885  | -2.88439275 |
| 6  | 2.86349701  | 1.74712507  | -0.59977948 |
| 1  | 3.34233679  | 0.24831735  | -3.15806712 |
| 1  | 1.92366008  | -0.83892902 | -3.29479373 |
| 1  | 1.69578128  | 0.92983599  | -3.32350574 |
| 1  | 3.85264931  | 1.82352115  | -1.07548430 |
| 1  | 2.22703418  | 2.57239311  | -0.94305614 |
| 1  | 2.97162923  | 1.82473586  | 0.48932088  |
| 1  | 4.40482910  | -0.74401980 | -0.97897316 |
| 1  | 3.51398552  | -1.06667295 | 0.55386041  |
| 1  | 3.19525150  | -2.06747392 | -0.88085507 |
| 6  | 2.72060623  | 0.43773469  | 2.96915849  |
| 6  | 3.20800179  | 1.72817346  | 3.23116463  |
| 1  | 3.32812888  | -0.44701430 | 3.17031318  |
| 1  | 4.21639839  | 1.85397174  | 3.63035009  |
| 6  | 2.40759360  | 2.85123866  | 2.98286508  |
| 1  | 2.79043612  | 3.85339476  | 3.18384092  |

|   |            |             |             |
|---|------------|-------------|-------------|
| 6 | 1.11213532 | 2.68443007  | 2.46905048  |
| 1 | 0.48094597 | 3.55672049  | 2.27656015  |
| 1 | 1.03943636 | -2.56834300 | -1.42498408 |
| 1 | 0.51618631 | -1.99947496 | -1.53220029 |

59

XYZ file for : 2-N

|    |             |             |             |
|----|-------------|-------------|-------------|
| 6  | -0.28029133 | 1.35946134  | 1.36214283  |
| 6  | -1.26706421 | 0.35594227  | 1.72695470  |
| 6  | -0.70060884 | -0.91548351 | 2.01645586  |
| 7  | 0.67211590  | -1.07358170 | 1.97753944  |
| 6  | 1.39790382  | 0.03840851  | 2.50024919  |
| 6  | 0.94477488  | 1.34190748  | 2.19545928  |
| 1  | -2.34228379 | 0.53097714  | 1.77163029  |
| 1  | -1.32726314 | -1.76674965 | 2.30152875  |
| 1  | -0.64324469 | 2.34710711  | 1.06610652  |
| 42 | -0.21977267 | -0.44545654 | -0.14182029 |
| 15 | -1.66085782 | 0.99841883  | -1.47719757 |
| 15 | -1.54962332 | -2.49012064 | -0.40193335 |
| 15 | 2.00957168  | 0.28445994  | -0.98523784 |
| 6  | -0.86911318 | -3.98237402 | 0.49131099  |
| 6  | -3.33316306 | -2.53845037 | 0.16217564  |
| 6  | -1.70801889 | -3.22905175 | -2.10339310 |
| 6  | -0.88380970 | 2.43884946  | -2.39088792 |
| 6  | -2.65947572 | 0.29011124  | -2.88705867 |
| 6  | -3.04427652 | 1.92914350  | -0.61845159 |
| 1  | -3.75867169 | -3.54754687 | 0.05483384  |
| 1  | -3.39687557 | -2.23365639 | 1.21597162  |
| 1  | -3.92289232 | -1.82939514 | -0.43472238 |
| 1  | -1.55459915 | -4.83954309 | 0.41608242  |
| 1  | 0.09559222  | -4.23629185 | 0.03204274  |
| 1  | -0.67881624 | -3.74688831 | 1.54599539  |
| 1  | -2.22352656 | -4.19996089 | -2.06006807 |
| 1  | -2.26218292 | -2.55060331 | -2.76297859 |
| 1  | -0.69881753 | -3.36444217 | -2.51383660 |
| 1  | -3.57263867 | 2.57787751  | -1.33266703 |
| 1  | -3.75545931 | 1.20683252  | -0.19484572 |
| 1  | -2.65070673 | 2.54878851  | 0.19773284  |
| 1  | -1.63461185 | 3.01816427  | -2.94949183 |
| 1  | -0.38742464 | 3.09394456  | -1.66232177 |
| 1  | -0.12714537 | 2.05919031  | -3.09068844 |
| 1  | -3.23621323 | 1.07929150  | -3.39161021 |
| 1  | -1.98107258 | -0.18496422 | -3.60816053 |
| 1  | -3.35449049 | -0.46952099 | -2.50466445 |
| 6  | 3.45826328  | -0.59401095 | -0.21901886 |
| 6  | 2.32256279  | -0.09189058 | -2.78233415 |

|   |             |             |             |
|---|-------------|-------------|-------------|
| 6 | 2.60640204  | 2.04869750  | -0.89581606 |
| 1 | 3.35293357  | 0.17293971  | -3.06282214 |
| 1 | 2.15619338  | -1.16445250 | -2.94680079 |
| 1 | 1.61708649  | 0.46577885  | -3.41200728 |
| 1 | 3.63656797  | 2.12813868  | -1.27472746 |
| 1 | 1.94960267  | 2.69482830  | -1.49247704 |
| 1 | 2.57569173  | 2.38183061  | 0.15008992  |
| 1 | 4.39808822  | -0.28526361 | -0.70036687 |
| 1 | 3.49646493  | -0.36274057 | 0.85306318  |
| 1 | 3.31097776  | -1.67578745 | -0.33295357 |
| 6 | 2.53922628  | -0.13971150 | 3.28718054  |
| 6 | 3.25231394  | 0.98233616  | 3.75105915  |
| 1 | 2.87166574  | -1.15480006 | 3.51400263  |
| 1 | 4.15847749  | 0.84025567  | 4.34307314  |
| 6 | 2.80652619  | 2.27250753  | 3.45102777  |
| 1 | 3.36242921  | 3.14178695  | 3.80728723  |
| 6 | 1.63923085  | 2.45337616  | 2.68424872  |
| 1 | 1.28433695  | 3.46249227  | 2.45568450  |
| 1 | 0.72187251  | -1.78972890 | -0.71768225 |
| 1 | -0.29410323 | -0.71974622 | -1.84883281 |

59

XYZ file for : **TS2-N**

|    |             |             |             |
|----|-------------|-------------|-------------|
| 6  | -0.04901840 | 1.50908991  | 1.43429574  |
| 6  | -1.19675221 | 0.68910411  | 1.77982691  |
| 6  | -0.87196430 | -0.66813411 | 2.05194282  |
| 7  | 0.47660663  | -1.07795893 | 1.99471527  |
| 6  | 1.40730786  | -0.11238708 | 2.52231405  |
| 6  | 1.16353110  | 1.25179929  | 2.24841960  |
| 1  | -2.22224059 | 1.04807292  | 1.86785131  |
| 1  | -1.62418488 | -1.39177189 | 2.37706082  |
| 1  | -0.23992557 | 2.54857978  | 1.15473943  |
| 42 | -0.29344107 | -0.27247878 | -0.05834596 |
| 15 | -1.73103770 | 0.95234346  | -1.62896266 |
| 15 | -1.51126594 | -2.39878319 | -0.31310358 |
| 15 | 1.85793745  | 0.44102038  | -1.03481678 |
| 6  | -0.94894920 | -3.82321886 | 0.76756204  |
| 6  | -3.35144402 | -2.44477764 | 0.04768769  |
| 6  | -1.48236023 | -3.28798468 | -1.94975225 |
| 6  | -1.13474518 | 2.57313160  | -2.37479383 |
| 6  | -2.36570993 | 0.15444192  | -3.19494556 |
| 6  | -3.34885995 | 1.59054141  | -0.92922605 |
| 1  | -3.74619799 | -3.47134683 | 0.00264810  |
| 1  | -3.54396232 | -2.02797391 | 1.04609133  |
| 1  | -3.87903629 | -1.82291422 | -0.68869074 |
| 1  | -1.62679958 | -4.68451451 | 0.67280352  |

|   |             |             |             |
|---|-------------|-------------|-------------|
| 1 | 0.06080373  | -4.11570477 | 0.44848923  |
| 1 | -0.88820051 | -3.51403584 | 1.81889095  |
| 1 | -2.05563933 | -4.22576075 | -1.89714461 |
| 1 | -1.89696014 | -2.64727020 | -2.73711545 |
| 1 | -0.43651800 | -3.50767489 | -2.20126115 |
| 1 | -3.94470632 | 2.10749165  | -1.69688826 |
| 1 | -3.92702970 | 0.75266521  | -0.51730659 |
| 1 | -3.13419248 | 2.29428400  | -0.11300602 |
| 1 | -1.91903260 | 3.06647417  | -2.96993800 |
| 1 | -0.82177675 | 3.24270016  | -1.56147945 |
| 1 | -0.26395105 | 2.38449905  | -3.01779254 |
| 1 | -2.92716584 | 0.87514989  | -3.80800290 |
| 1 | -1.51675985 | -0.23571774 | -3.77236641 |
| 1 | -3.02682800 | -0.68417369 | -2.93803627 |
| 6 | 3.37343992  | -0.42590356 | -0.37537621 |
| 6 | 2.11505177  | 0.13883601  | -2.85776009 |
| 6 | 2.43877534  | 2.21446206  | -0.93481572 |
| 1 | 3.11117674  | 0.48025459  | -3.17775313 |
| 1 | 2.00953523  | -0.93663694 | -3.05114536 |
| 1 | 1.34556173  | 0.66739015  | -3.43615142 |
| 1 | 3.42411721  | 2.32981501  | -1.41137655 |
| 1 | 1.71272135  | 2.86775404  | -1.43604395 |
| 1 | 2.50992445  | 2.50970743  | 0.11974507  |
| 1 | 4.28042992  | -0.07594257 | -0.89103053 |
| 1 | 3.46550033  | -0.23391764 | 0.70152889  |
| 1 | 3.25390722  | -1.50699263 | -0.52803976 |
| 6 | 2.50427325  | -0.51048937 | 3.28450991  |
| 6 | 3.40875868  | 0.46020654  | 3.75782609  |
| 1 | 2.65737088  | -1.57284806 | 3.48446020  |
| 1 | 4.28827231  | 0.15209504  | 4.32561597  |
| 6 | 3.17949069  | 1.81263150  | 3.49292896  |
| 1 | 3.88060083  | 2.56653296  | 3.85632560  |
| 6 | 2.04665983  | 2.21171285  | 2.75765045  |
| 1 | 1.86223403  | 3.27327385  | 2.57086981  |
| 1 | 0.74512876  | -1.56108781 | 0.66124267  |
| 1 | 0.00529621  | -1.00602919 | -1.61252078 |

59

XYZ file for : 3-N

|   |             |             |            |
|---|-------------|-------------|------------|
| 6 | 0.19736993  | 1.70220509  | 1.32710985 |
| 6 | -1.07327731 | 1.07701676  | 1.63938145 |
| 6 | -1.03166728 | -0.29167884 | 2.01784827 |
| 7 | 0.32479828  | -0.81261053 | 2.06112637 |
| 6 | 1.35327397  | 0.00307283  | 2.64012411 |
| 6 | 1.33069536  | 1.34278157  | 2.18987980 |
| 1 | -2.02131717 | 1.61381909  | 1.66151706 |

|    |             |             |             |
|----|-------------|-------------|-------------|
| 1  | -1.83008021 | -0.82947049 | 2.52568108  |
| 1  | 0.16969102  | 2.73095749  | 0.96365183  |
| 42 | -0.38389611 | -0.14640389 | -0.10165543 |
| 15 | -1.93441735 | 1.16954214  | -1.37023133 |
| 15 | -1.30292287 | -2.35930115 | -0.43274516 |
| 15 | 1.77514268  | 0.09041182  | -1.21244161 |
| 6  | -0.86215043 | -3.66295935 | 0.86086587  |
| 6  | -3.16281044 | -2.63941157 | -0.43067601 |
| 6  | -0.88402777 | -3.35727064 | -1.95845295 |
| 6  | -1.70261125 | 3.03844336  | -1.36656843 |
| 6  | -2.13958906 | 0.91371110  | -3.20940764 |
| 6  | -3.75514986 | 1.15434327  | -0.88269485 |
| 1  | -3.42236989 | -3.70970113 | -0.46164542 |
| 1  | -3.59521830 | -2.18180128 | 0.47006560  |
| 1  | -3.59491837 | -2.14017403 | -1.30910775 |
| 1  | -1.30339789 | -4.63853880 | 0.60800036  |
| 1  | 0.23075726  | -3.77359708 | 0.91320173  |
| 1  | -1.24397581 | -3.36625849 | 1.84940432  |
| 1  | -1.38715447 | -4.33643059 | -1.96038014 |
| 1  | -1.18486182 | -2.78829222 | -2.84854919 |
| 1  | 0.20356585  | -3.50627580 | -1.99938397 |
| 1  | -4.34013967 | 1.88486631  | -1.46299167 |
| 1  | -4.16568912 | 0.14953779  | -1.04740016 |
| 1  | -3.85241503 | 1.38842559  | 0.18690212  |
| 1  | -2.47980609 | 3.54275138  | -1.96102454 |
| 1  | -1.74733140 | 3.41511991  | -0.33501654 |
| 1  | -0.71282046 | 3.28079438  | -1.77618530 |
| 1  | -2.89403964 | 1.59358595  | -3.63282538 |
| 1  | -1.17297610 | 1.08534070  | -3.70238953 |
| 1  | -2.43984546 | -0.12693434 | -3.39402594 |
| 6  | 3.29003753  | -0.43375719 | -0.24393432 |
| 6  | 2.12694498  | -0.80838322 | -2.81229020 |
| 6  | 2.31542611  | 1.80842939  | -1.72065688 |
| 1  | 3.14262710  | -0.59461391 | -3.17932077 |
| 1  | 2.02031278  | -1.88912287 | -2.64742763 |
| 1  | 1.39010187  | -0.50205635 | -3.56686895 |
| 1  | 3.32322023  | 1.79996084  | -2.16508673 |
| 1  | 1.59735477  | 2.20573742  | -2.45109184 |
| 1  | 2.30731043  | 2.45766594  | -0.83536775 |
| 1  | 4.20480788  | -0.26796205 | -0.83294455 |
| 1  | 3.35044101  | 0.13732303  | 0.69102428  |
| 1  | 3.20563596  | -1.50093740 | 0.00337080  |
| 6  | 2.34562119  | -0.48189728 | 3.48618322  |
| 6  | 3.39174341  | 0.37493257  | 3.87552240  |
| 1  | 2.33004394  | -1.52351804 | 3.81809285  |
| 1  | 4.19003817  | 0.00041477  | 4.51744138  |

|   |             |             |             |
|---|-------------|-------------|-------------|
| 6 | 3.40378999  | 1.70031799  | 3.42721916  |
| 1 | 4.21741000  | 2.36558525  | 3.72235698  |
| 6 | 2.37494455  | 2.18636829  | 2.60346486  |
| 1 | 2.38565128  | 3.22745839  | 2.27171278  |
| 1 | 0.37842299  | -1.79698379 | 2.31255977  |
| 1 | -0.43697321 | -0.58513130 | -1.76427264 |

61

XYZ file for : 4-N

|    |             |             |             |
|----|-------------|-------------|-------------|
| 6  | 0.19013782  | 1.80856443  | 1.44162305  |
| 6  | -1.07741826 | 1.19140876  | 1.78125193  |
| 6  | -1.03183642 | -0.16876997 | 2.18821434  |
| 7  | 0.32455776  | -0.68990973 | 2.23046823  |
| 6  | 1.35936948  | 0.13800927  | 2.77986104  |
| 6  | 1.33273188  | 1.46724879  | 2.29982968  |
| 1  | -2.02494851 | 1.72915240  | 1.80207908  |
| 1  | -1.82571432 | -0.69494085 | 2.71491793  |
| 1  | 0.15816436  | 2.82971478  | 1.05765045  |
| 42 | -0.40588909 | -0.06943705 | 0.05966258  |
| 15 | -1.96397418 | 1.22339878  | -1.22337351 |
| 15 | -1.33050048 | -2.28896966 | -0.21020068 |
| 15 | 1.74307566  | 0.14476703  | -1.07445085 |
| 6  | -0.91557033 | -3.55129140 | 1.13138406  |
| 6  | -3.19117058 | -2.56097660 | -0.23009253 |
| 6  | -0.89191084 | -3.33821007 | -1.69572047 |
| 6  | -1.73119325 | 3.09169116  | -1.25257605 |
| 6  | -2.17907343 | 0.93747848  | -3.05691648 |
| 6  | -3.78188340 | 1.21692216  | -0.72529946 |
| 1  | -3.45546242 | -3.63056058 | -0.23634844 |
| 1  | -3.63533270 | -2.07721156 | 0.65103452  |
| 1  | -3.60625420 | -2.08363016 | -1.12868198 |
| 1  | -1.36325903 | -4.53066146 | 0.90617844  |
| 1  | 0.17559581  | -3.67135054 | 1.19886406  |
| 1  | -1.30449036 | -3.21807119 | 2.10528253  |
| 1  | -1.39491060 | -4.31712512 | -1.67120492 |
| 1  | -1.18184357 | -2.79983946 | -2.60817731 |
| 1  | 0.19622195  | -3.48785876 | -1.71696809 |
| 1  | -4.37000666 | 1.93906721  | -1.31289192 |
| 1  | -4.19402989 | 0.21010743  | -0.87281108 |
| 1  | -3.87252328 | 1.46663693  | 0.34136412  |
| 1  | -2.51137581 | 3.58578814  | -1.85165894 |
| 1  | -1.77034096 | 3.48667354  | -0.22770992 |
| 1  | -0.74363965 | 3.32621343  | -1.67201739 |
| 1  | -2.93708461 | 1.60940397  | -3.48665770 |
| 1  | -1.21569551 | 1.10332834  | -3.55809423 |
| 1  | -2.47851454 | -0.10631599 | -3.22389722 |



|   |             |             |             |
|---|-------------|-------------|-------------|
| 6 | 3.25611313  | -0.42085341 | -0.12613561 |
| 6 | 2.06235103  | -0.73932621 | -2.68915864 |
| 6 | 2.31324485  | 1.85764248  | -1.56643793 |
| 1 | 3.08118702  | -0.54707320 | -3.05935074 |
| 1 | 1.92677381  | -1.81911601 | -2.54076577 |
| 1 | 1.33027110  | -0.40040274 | -3.43452578 |
| 1 | 3.31499572  | 1.83342641  | -2.02366929 |
| 1 | 1.59485360  | 2.28002366  | -2.28230863 |
| 1 | 2.33094785  | 2.49503908  | -0.67276536 |
| 1 | 4.17015051  | -0.26083658 | -0.71791662 |
| 1 | 3.33177412  | 0.13413329  | 0.81749423  |
| 1 | 3.15477403  | -1.49034643 | 0.10437271  |
| 6 | 2.35995431  | -0.32814663 | 3.62689174  |
| 6 | 3.41041277  | 0.53661089  | 3.98601126  |
| 1 | 2.34704836  | -1.36180490 | 3.98289260  |
| 1 | 4.21481631  | 0.17625860  | 4.62840813  |
| 6 | 3.41883325  | 1.85123354  | 3.50713464  |
| 1 | 4.23558658  | 2.52257322  | 3.77892646  |
| 6 | 2.38182749  | 2.31907120  | 2.68306874  |
| 1 | 2.38923461  | 3.35258231  | 2.32829815  |
| 1 | 0.37972152  | -1.66809308 | 2.50460663  |
| 1 | -0.48282222 | -0.55501890 | -1.58900239 |
| 1 | -0.93405778 | -1.62127950 | -5.98065687 |
| 1 | -0.58914976 | -1.65521321 | -5.31336821 |

61

XYZ file for : **TS3-N**

|    |             |             |             |
|----|-------------|-------------|-------------|
| 6  | 0.22750653  | 2.77868592  | 2.19786761  |
| 6  | -0.95153616 | 2.12814646  | 1.90748288  |
| 6  | -1.08431306 | 0.69263021  | 1.89968250  |
| 7  | 0.20002720  | 0.00896770  | 2.05808322  |
| 6  | 1.26857364  | 0.63416848  | 2.78405021  |
| 6  | 1.34012905  | 2.04989587  | 2.76638354  |
| 1  | -1.84530831 | 2.70878542  | 1.66799589  |
| 1  | -1.95219880 | 0.21245166  | 2.36425732  |
| 1  | 0.30502952  | 3.86141559  | 2.08947869  |
| 42 | -0.32137082 | 0.29463321  | -0.14318569 |
| 15 | -2.34728488 | 1.04953441  | -1.23997560 |
| 15 | -1.00471620 | -1.92229967 | -0.24095488 |
| 15 | 1.98523414  | -0.15116519 | -0.95570038 |
| 6  | -0.25521341 | -3.14665280 | 1.00805413  |
| 6  | -2.79757526 | -2.41127811 | 0.10577687  |
| 6  | -0.74950514 | -2.96784053 | -1.78773110 |
| 6  | -2.34069838 | 2.79563642  | -1.93318402 |
| 6  | -2.99129237 | 0.17391836  | -2.75966738 |
| 6  | -3.94281742 | 1.16715132  | -0.25128943 |

1 -2.92226541 -3.50477247 0.13659582  
1 -3.10164839 -1.98867342 1.07437725  
1 -3.46218972 -2.00514672 -0.66821966  
1 -0.55286256 -4.18128442 0.78021364  
1 0.84112260 -3.08275669 1.00342648  
1 -0.61882082 -2.91902765 2.02370062  
1 -1.18463183 -3.97490459 -1.68764266  
1 -1.20414506 -2.45204848 -2.64432656  
1 0.32860841 -3.06021051 -1.98160151  
1 -4.76865679 1.55414931 -0.86747444  
1 -4.21365545 0.17711720 0.13764312  
1 -3.79361638 1.84090061 0.60393433  
1 -3.30843291 3.04550339 -2.39374069  
1 -2.12679272 3.50898153 -1.12563284  
1 -1.54421024 2.87766328 -2.68479711  
1 -3.90434046 0.66049861 -3.13426521  
1 -2.21094774 0.20500080 -3.53137048  
1 -3.21090714 -0.87715220 -2.53290167  
6 2.96965871 -1.61105900 -0.31467961  
6 2.23009317 -0.36650674 -2.78752692  
6 3.25084896 1.18998355 -0.61037224  
1 3.28982073 -0.54258402 -3.02693540  
1 1.62282240 -1.20950402 -3.14037181  
1 1.87995841 0.54205368 -3.29424233  
1 4.24528606 0.90957140 -0.99011654  
1 2.92594361 2.12422395 -1.08691440  
1 3.31131266 1.35980739 0.47379393  
1 3.99302953 -1.60512822 -0.72032190  
1 3.02000819 -1.55993804 0.78188684  
1 2.47316259 -2.54747696 -0.60263463  
6 2.24909329 -0.13191435 3.41527320  
6 3.36026116 0.49471680 4.00296250  
1 2.16339701 -1.22224795 3.42731354  
1 4.13368890 -0.10832100 4.48035415  
6 3.47028274 1.89042371 3.96074954  
1 4.33620348 2.38342772 4.40560654  
6 2.46798367 2.65701157 3.35588960  
1 2.54393774 3.74680577 3.34300518  
1 0.09640337 -0.96966436 2.32039760  
1 -0.35864447 0.37261227 -1.90434806  
1 0.57281468 3.01766494 -0.87778314  
1 0.39334602 2.33234011 -1.17713200

61

XYZ file for : 5-N

6 0.55715322 2.03675093 1.29316003

|    |             |             |             |
|----|-------------|-------------|-------------|
| 6  | -0.83927191 | 1.69725194  | 1.39291868  |
| 6  | -1.00097208 | 0.30590969  | 1.78233662  |
| 7  | -0.14661527 | -0.17327566 | 2.83605306  |
| 6  | 1.10835904  | 0.35669933  | 3.05353521  |
| 6  | 1.49694415  | 1.48919535  | 2.27588728  |
| 1  | -1.63547430 | 2.44468205  | 1.43894568  |
| 1  | -2.02652924 | -0.03693254 | 1.94154000  |
| 1  | 0.80682011  | 3.03620314  | 0.92315203  |
| 42 | -0.29747778 | 0.58560279  | -0.41796443 |
| 15 | -2.58700598 | 1.27794426  | -1.02245752 |
| 15 | -0.96062495 | -1.79555408 | -0.39836391 |
| 15 | 2.10595878  | -0.10878596 | -0.71138803 |
| 6  | 0.08778960  | -3.02431613 | 0.54782675  |
| 6  | -2.64017438 | -2.32634056 | 0.24714934  |
| 6  | -1.04540516 | -2.68580008 | -2.04184740 |
| 6  | -2.75606379 | 3.08700507  | -1.46741555 |
| 6  | -3.39170491 | 0.53144615  | -2.53306880 |
| 6  | -4.02595687 | 1.16395642  | 0.18011350  |
| 1  | -2.75212141 | -3.41753882 | 0.16381231  |
| 1  | -2.76051025 | -2.03468775 | 1.29854282  |
| 1  | -3.43425429 | -1.84799648 | -0.34131464 |
| 1  | -0.41031297 | -4.00339640 | 0.60801589  |
| 1  | 1.05075455  | -3.15054127 | 0.03626772  |
| 1  | 0.28664799  | -2.64514854 | 1.55837573  |
| 1  | -1.29765093 | -3.74946463 | -1.91244731 |
| 1  | -1.80468680 | -2.20155412 | -2.66986012 |
| 1  | -0.08261736 | -2.59300557 | -2.55869298 |
| 1  | -4.93301587 | 1.60620325  | -0.25774818 |
| 1  | -4.22854520 | 0.11616335  | 0.43666141  |
| 1  | -3.78251734 | 1.70236356  | 1.10657989  |
| 1  | -3.79879094 | 3.35769417  | -1.69260383 |
| 1  | -2.39201318 | 3.70030565  | -0.63136903 |
| 1  | -2.12815516 | 3.29254942  | -2.34530693 |
| 1  | -4.35268687 | 1.01813226  | -2.75715991 |
| 1  | -2.70591153 | 0.64765507  | -3.38250566 |
| 1  | -3.56299008 | -0.54234244 | -2.37619266 |
| 6  | 3.17415165  | -1.00014724 | 0.54353772  |
| 6  | 2.45699686  | -1.18033950 | -2.20505349 |
| 6  | 3.26885135  | 1.30036567  | -1.10621506 |
| 1  | 3.54015545  | -1.25682285 | -2.38391640 |
| 1  | 2.05716136  | -2.19122714 | -2.04631709 |
| 1  | 1.96213649  | -0.74420632 | -3.08239528 |
| 1  | 4.29371096  | 0.93468353  | -1.26994964 |
| 1  | 2.91546906  | 1.81368913  | -2.01112505 |
| 1  | 3.26867838  | 2.01109781  | -0.27012470 |
| 1  | 4.16795736  | -1.19763287 | 0.11341746  |

|   |             |             |             |
|---|-------------|-------------|-------------|
| 1 | 3.28343963  | -0.38043004 | 1.44152415  |
| 1 | 2.71206070  | -1.95115324 | 0.83462055  |
| 6 | 1.99314272  | -0.18320461 | 4.00622313  |
| 6 | 3.24960758  | 0.39199418  | 4.21647867  |
| 1 | 1.68613721  | -1.05810574 | 4.58651425  |
| 1 | 3.92380325  | -0.04021042 | 4.95782420  |
| 6 | 3.63428156  | 1.52636327  | 3.48354464  |
| 1 | 4.60694037  | 1.98974272  | 3.65541328  |
| 6 | 2.75777918  | 2.06301177  | 2.53364924  |
| 1 | 3.04822353  | 2.95610799  | 1.97278884  |
| 1 | -0.33453538 | -1.09444504 | 3.21674820  |
| 1 | -0.43205673 | 0.16168106  | -2.12181939 |
| 1 | -0.19088857 | 2.15063167  | -1.35751970 |
| 1 | 0.65692369  | 1.89100312  | -1.27827589 |

61

XYZ file for : **TS4-N**

|    |             |             |             |
|----|-------------|-------------|-------------|
| 6  | -0.19604321 | 1.74577362  | 1.64700629  |
| 6  | -1.06461075 | 0.57460516  | 1.82031505  |
| 6  | -0.27333657 | -0.62492683 | 1.98154968  |
| 7  | 0.86663839  | -0.55277802 | 2.85532042  |
| 6  | 1.57362176  | 0.61743251  | 3.01817530  |
| 6  | 1.06214004  | 1.80929734  | 2.43060678  |
| 1  | -2.11756510 | 0.66377422  | 2.09012212  |
| 1  | -0.81941291 | -1.55482773 | 2.16352531  |
| 1  | -0.72190375 | 2.70775153  | 1.59217956  |
| 42 | -0.29720409 | 0.24287066  | -0.19775797 |
| 15 | -2.30027675 | 1.43853929  | -0.99136883 |
| 15 | -1.24449951 | -2.00767868 | -0.63375154 |
| 15 | 2.05415725  | -0.48250613 | -0.52842221 |
| 6  | -0.30448349 | -3.55318058 | -0.12531333 |
| 6  | -2.88405265 | -2.42828332 | 0.17943547  |
| 6  | -1.61760166 | -2.50147033 | -2.39303549 |
| 6  | -1.91079113 | 3.08655345  | -1.79307513 |
| 6  | -3.38959020 | 0.74526764  | -2.34483076 |
| 6  | -3.63862577 | 1.98987948  | 0.19660796  |
| 1  | -3.19947280 | -3.45964131 | -0.04079529 |
| 1  | -2.79601575 | -2.30494782 | 1.26824678  |
| 1  | -3.65208634 | -1.72810280 | -0.17619913 |
| 1  | -0.89164203 | -4.46295293 | -0.32271815 |
| 1  | 0.63528535  | -3.60702588 | -0.69168225 |
| 1  | -0.06185275 | -3.50686262 | 0.94488290  |
| 1  | -2.04029133 | -3.51631028 | -2.43883081 |
| 1  | -2.32193517 | -1.78923483 | -2.83791734 |
| 1  | -0.68596390 | -2.46168009 | -2.97264897 |
| 1  | -4.39456425 | 2.60132300  | -0.31779098 |

|   |             |             |             |
|---|-------------|-------------|-------------|
| 1 | -4.12677773 | 1.10886486  | 0.63636420  |
| 1 | -3.20006384 | 2.58134917  | 1.01253067  |
| 1 | -2.81714510 | 3.59004043  | -2.16257490 |
| 1 | -1.40643531 | 3.73309055  | -1.06144225 |
| 1 | -1.21831068 | 2.91009741  | -2.62713020 |
| 1 | -4.16128723 | 1.47278789  | -2.63843812 |
| 1 | -2.76165361 | 0.50916207  | -3.21432041 |
| 1 | -3.88115871 | -0.17584695 | -2.00362764 |
| 6 | 2.96496060  | -1.72871194 | 0.53554205  |
| 6 | 2.43119369  | -1.18776629 | -2.21943176 |
| 6 | 3.33432676  | 0.88221974  | -0.49384992 |
| 1 | 3.51080034  | -1.35401481 | -2.35778803 |
| 1 | 1.89756289  | -2.13952421 | -2.34879363 |
| 1 | 2.05941726  | -0.48492526 | -2.97639362 |
| 1 | 4.34457253  | 0.49209021  | -0.69046324 |
| 1 | 3.07552764  | 1.62719993  | -1.25864442 |
| 1 | 3.31387315  | 1.37199575  | 0.48936725  |
| 1 | 3.92861330  | -1.99202049 | 0.07396472  |
| 1 | 3.16188989  | -1.28185539 | 1.51863756  |
| 1 | 2.36455016  | -2.63810328 | 0.66510314  |
| 6 | 2.78405220  | 0.66094416  | 3.74500965  |
| 6 | 3.47416054  | 1.86235246  | 3.90092209  |
| 1 | 3.17079710  | -0.25782469 | 4.19468074  |
| 1 | 4.40754300  | 1.87715571  | 4.46654391  |
| 6 | 2.97020961  | 3.04779663  | 3.33785753  |
| 1 | 3.50545253  | 3.98969817  | 3.46442957  |
| 6 | 1.77501987  | 3.00736408  | 2.61474902  |
| 1 | 1.37854687  | 3.92491796  | 2.17005629  |
| 1 | 1.37303032  | -1.41663871 | 3.02003012  |
| 1 | -0.38167683 | 0.08738439  | -1.95521668 |
| 1 | 0.31304805  | 1.91204322  | 0.15671139  |
| 1 | 0.55999599  | 1.65272567  | -0.86297826 |

61

XYZ file for : **6-N**

|    |             |             |             |
|----|-------------|-------------|-------------|
| 6  | -0.12840266 | 1.81151951  | 1.58628218  |
| 6  | -0.93331675 | 0.54814179  | 1.75235797  |
| 6  | -0.06488143 | -0.59618072 | 1.91897929  |
| 7  | 1.11694053  | -0.43410971 | 2.72574061  |
| 6  | 1.65413880  | 0.78984929  | 3.03901919  |
| 6  | 1.04057236  | 1.96404120  | 2.52844080  |
| 1  | -1.95124673 | 0.60561505  | 2.13953006  |
| 1  | -0.54651908 | -1.54702617 | 2.16495998  |
| 1  | -0.76683176 | 2.70675897  | 1.59496402  |
| 42 | -0.27339287 | 0.10833937  | -0.28353981 |
| 15 | -2.19245252 | 1.47113577  | -1.03639756 |

|    |             |             |             |
|----|-------------|-------------|-------------|
| 15 | -1.34954645 | -2.06133854 | -0.54359336 |
| 15 | 2.04346835  | -0.60360940 | -0.69196800 |
| 6  | -0.40562875 | -3.64056036 | -0.15282844 |
| 6  | -2.85941516 | -2.38154379 | 0.52904276  |
| 6  | -2.02849046 | -2.58746456 | -2.19673426 |
| 6  | -1.77820108 | 3.24756393  | -1.47425840 |
| 6  | -3.10100647 | 1.01559941  | -2.60313601 |
| 6  | -3.65995806 | 1.78112223  | 0.08290646  |
| 1  | -3.23128297 | -3.41126578 | 0.41509170  |
| 1  | -2.61476279 | -2.20382840 | 1.58569057  |
| 1  | -3.65014110 | -1.67489807 | 0.24158876  |
| 1  | -1.05890947 | -4.52522371 | -0.20093731 |
| 1  | 0.40495436  | -3.75566593 | -0.88562138 |
| 1  | 0.03858079  | -3.57155890 | 0.84914291  |
| 1  | -2.50692122 | -3.57586004 | -2.13070822 |
| 1  | -2.75824928 | -1.85135223 | -2.55397005 |
| 1  | -1.20145854 | -2.62455309 | -2.91821712 |
| 1  | -4.39652042 | 2.43997010  | -0.40087691 |
| 1  | -4.13850160 | 0.82536826  | 0.33667146  |
| 1  | -3.32364771 | 2.25185451  | 1.01727954  |
| 1  | -2.67055906 | 3.81479529  | -1.78052031 |
| 1  | -1.31233681 | 3.74382963  | -0.61160396 |
| 1  | -1.04606996 | 3.23615993  | -2.29282169 |
| 1  | -3.78584964 | 1.81987370  | -2.91151386 |
| 1  | -2.36738474 | 0.82640718  | -3.39759144 |
| 1  | -3.68234079 | 0.09890388  | -2.43607525 |
| 6  | 2.92309993  | -2.03266754 | 0.14705779  |
| 6  | 2.44395094  | -1.00851070 | -2.46928246 |
| 6  | 3.32524341  | 0.72241288  | -0.37438093 |
| 1  | 3.52340462  | -1.17030034 | -2.61088855 |
| 1  | 1.89413846  | -1.91171994 | -2.76681293 |
| 1  | 2.10252219  | -0.17769354 | -3.09989059 |
| 1  | 4.33685713  | 0.37796294  | -0.63846998 |
| 1  | 3.06660022  | 1.60468902  | -0.97512900 |
| 1  | 3.30356791  | 1.00869102  | 0.68615398  |
| 1  | 3.94865659  | -2.13606769 | -0.23881141 |
| 1  | 2.97355351  | -1.84246419 | 1.22712256  |
| 1  | 2.37790365  | -2.96963327 | -0.02029450 |
| 6  | 2.80117280  | 0.91274963  | 3.85966327  |
| 6  | 3.30787671  | 2.16964908  | 4.18113228  |
| 1  | 3.28141202  | 0.01003866  | 4.24687407  |
| 1  | 4.19098196  | 2.24299728  | 4.81887151  |
| 6  | 2.68935892  | 3.33599533  | 3.69903972  |
| 1  | 3.08217387  | 4.31939568  | 3.95903388  |
| 6  | 1.56517116  | 3.21606983  | 2.87566451  |
| 1  | 1.08247899  | 4.11506417  | 2.48130417  |

1 1.66005220 -1.26007721 2.94750869  
1 -0.48486980 -0.37576307 -1.93570700  
1 0.34229376 1.85638568 0.50552327  
1 0.49611283 1.13732981 -1.45900826

63

XYZ file for : 7-N

6 -0.25152677 1.83694409 1.17368720  
6 -1.12668584 0.61863147 1.32926300  
6 -0.31932878 -0.54579402 1.62995059  
7 0.78499968 -0.38541183 2.54217725  
6 1.35349147 0.83152292 2.83108747  
6 0.84040645 1.99519184 2.20277056  
1 -2.16792532 0.74106814 1.63330808  
1 -0.85163682 -1.46843218 1.87320049  
1 -0.84435482 2.75634925 1.08396060  
42 -0.29921991 0.03155568 -0.61195051  
15 -2.07019720 1.36913402 -1.67881066  
15 -1.49568106 -2.06936724 -0.88648566  
15 2.00716612 -0.80831745 -0.75262656  
6 -0.60502056 -3.70855816 -0.66731727  
6 -2.94621393 -2.40319196 0.26203830  
6 -2.32721633 -2.44525210 -2.51428682  
6 -2.04644809 3.23344206 -1.45140894  
6 -2.08472404 1.32474295 -3.54261246  
6 -3.88903382 1.09441389 -1.31902225  
1 -3.40421194 -3.37990557 0.04503884  
1 -2.61864358 -2.39393132 1.31061219  
1 -3.69698193 -1.61196704 0.13574713  
1 -1.28605463 -4.56406879 -0.79490930  
1 0.20294914 -3.77620010 -1.40888250  
1 -0.16185555 -3.74495871 0.33725871  
1 -2.84230387 -3.41654180 -2.47852732  
1 -3.05720929 -1.66084776 -2.75346610  
1 -1.56517750 -2.45989806 -3.30484547  
1 -4.52092570 1.81728390 -1.85753413  
1 -4.18024740 0.07724527 -1.61385739  
1 -4.06000208 1.20066363 -0.23851317  
1 -2.79093004 3.71949295 -2.09969715  
1 -2.27257290 3.49210072 -0.40790317  
1 -1.04478627 3.61128416 -1.69771397  
1 -2.87950412 1.96592861 -3.95283965  
1 -1.10501636 1.66925802 -3.89926155  
1 -2.22461642 0.29240092 -3.88675698  
6 2.70627029 -2.26336992 0.20297889  
6 2.56652459 -1.28412603 -2.46778617

|   |             |             |             |
|---|-------------|-------------|-------------|
| 6 | 3.32365368  | 0.45361560  | -0.33462086 |
| 1 | 3.64104550  | -1.52134538 | -2.48662942 |
| 1 | 1.99030088  | -2.15435025 | -2.80962538 |
| 1 | 2.35477825  | -0.44763265 | -3.14594064 |
| 1 | 4.33485792  | 0.04849475  | -0.49312674 |
| 1 | 3.17351956  | 1.33353151  | -0.97465525 |
| 1 | 3.21703225  | 0.76758716  | 0.71268114  |
| 1 | 3.76388765  | -2.42460506 | -0.05569594 |
| 1 | 2.63747889  | -2.06219788 | 1.28009179  |
| 1 | 2.13712539  | -3.17378095 | -0.02218786 |
| 6 | 2.43050918  | 0.95505011  | 3.74077263  |
| 6 | 2.96636507  | 2.20717041  | 4.03318539  |
| 1 | 2.83240353  | 0.05836796  | 4.22016076  |
| 1 | 3.79471461  | 2.28265389  | 4.74034314  |
| 6 | 2.44493237  | 3.36643663  | 3.43388921  |
| 1 | 2.85941596  | 4.34677958  | 3.67091137  |
| 6 | 1.38965434  | 3.24370889  | 2.52421983  |
| 1 | 0.98399447  | 4.13635292  | 2.03922141  |
| 1 | 1.28775770  | -1.21843001 | 2.82543787  |
| 1 | -0.33622369 | -0.61663828 | -2.22292611 |
| 1 | 0.30199788  | 1.80796804  | 0.13374926  |
| 1 | 0.61465221  | 0.96713144  | -1.76831514 |
| 1 | -1.17308440 | -1.99238183 | 5.13870937  |
| 1 | -0.79634423 | -1.46767854 | 4.75221968  |

63

XYZ file for : **TS5-N**

|    |             |             |             |
|----|-------------|-------------|-------------|
| 6  | -0.01542429 | 2.32455703  | 1.12899072  |
| 6  | -1.02955531 | 1.23721844  | 0.75603457  |
| 6  | -0.88647947 | -0.05695564 | 1.37744712  |
| 7  | 0.26905502  | -0.22990030 | 2.22875922  |
| 6  | 0.67616627  | 0.83910795  | 3.03285453  |
| 6  | 0.51284501  | 2.15534401  | 2.54020307  |
| 1  | -2.06447771 | 1.59582812  | 0.71218136  |
| 1  | -1.80007350 | -0.50473999 | 1.79576535  |
| 1  | -0.47040995 | 3.32164815  | 1.02135552  |
| 42 | -0.82181985 | -0.33184213 | -0.90284543 |
| 15 | -1.22784006 | 1.59828980  | -2.36824713 |
| 15 | -1.13530411 | -2.66505827 | -0.24696206 |
| 15 | 1.50026730  | -0.55571118 | -1.39089934 |
| 6  | -1.01918583 | -3.97326278 | -1.57600935 |
| 6  | -0.19779648 | -3.52659211 | 1.13676284  |
| 6  | -2.86902311 | -3.05322642 | 0.36046577  |
| 6  | -0.29768013 | 3.22589212  | -2.30667037 |
| 6  | -1.18179685 | 1.28076507  | -4.20838206 |
| 6  | -2.96580186 | 2.29432767  | -2.24511021 |



|   |             |             |             |
|---|-------------|-------------|-------------|
| 1 | -0.42687999 | -4.60273770 | 1.16144321  |
| 1 | 0.88474967  | -3.38779316 | 1.01874601  |
| 1 | -0.50274210 | -3.08993913 | 2.09896018  |
| 1 | -1.37643578 | -4.94724328 | -1.20915517 |
| 1 | -1.62934685 | -3.64961481 | -2.42948560 |
| 1 | 0.01943343  | -4.07444490 | -1.91439797 |
| 1 | -2.95489586 | -4.10772807 | 0.66324560  |
| 1 | -3.12008184 | -2.41222021 | 1.21704174  |
| 1 | -3.58342134 | -2.84776326 | -0.44765226 |
| 1 | -3.10275344 | 3.13870343  | -2.93732588 |
| 1 | -3.68745093 | 1.50380097  | -2.48982059 |
| 1 | -3.15748605 | 2.63607435  | -1.21866699 |
| 1 | -0.66096413 | 3.91261009  | -3.08637590 |
| 1 | -0.44464207 | 3.69083533  | -1.32330979 |
| 1 | 0.77831812  | 3.05946502  | -2.44806205 |
| 1 | -1.53834724 | 2.15482865  | -4.77387347 |
| 1 | -0.15638977 | 1.04283275  | -4.51855514 |
| 1 | -1.81623747 | 0.41145849  | -4.42530780 |
| 6 | 2.24627120  | -2.24971162 | -1.67605834 |
| 6 | 2.22407627  | 0.25683181  | -2.91397000 |
| 6 | 2.70587734  | 0.08632883  | -0.10675961 |
| 1 | 3.30884559  | 0.08208283  | -2.97129182 |
| 1 | 1.74332342  | -0.16509567 | -3.80702550 |
| 1 | 2.03877412  | 1.33817319  | -2.88842153 |
| 1 | 3.73847986  | -0.16554914 | -0.39050740 |
| 1 | 2.61686745  | 1.17777327  | -0.02169570 |
| 1 | 2.46444489  | -0.35367536 | 0.86946487  |
| 1 | 3.32566289  | -2.17160478 | -1.87431694 |
| 1 | 2.09173099  | -2.88551329 | -0.79483725 |
| 1 | 1.75372794  | -2.71345989 | -2.54135241 |
| 6 | 1.28045707  | 0.63559828  | 4.28989599  |
| 6 | 1.69572324  | 1.72537925  | 5.05894229  |
| 1 | 1.41222148  | -0.38308566 | 4.66541544  |
| 1 | 2.15629485  | 1.55071399  | 6.03329964  |
| 6 | 1.50476959  | 3.03355491  | 4.59383281  |
| 1 | 1.81473974  | 3.88666737  | 5.19871322  |
| 6 | 0.91423370  | 3.23261923  | 3.33876002  |
| 1 | 0.77624929  | 4.24899859  | 2.95899205  |
| 1 | 0.34026241  | -1.13972927 | 2.67406742  |
| 1 | -1.94990482 | -0.94852080 | -2.04573195 |
| 1 | 0.84436433  | 2.31349987  | 0.43708312  |
| 1 | -0.30300617 | -1.05746865 | -2.42384171 |
| 1 | -3.65292334 | -0.30472387 | -0.70822744 |
| 1 | -4.07516998 | -0.04023016 | -0.13933850 |

XYZ file for : **8-N**

|    |             |             |             |
|----|-------------|-------------|-------------|
| 6  | 0.25005281  | 2.40628059  | 1.03065640  |
| 6  | -0.86250162 | 1.39338309  | 0.74303977  |
| 6  | -0.73787611 | 0.08229293  | 1.30143142  |
| 7  | 0.46051648  | -0.19319510 | 2.06993261  |
| 6  | 1.01183463  | 0.83550503  | 2.84322270  |
| 6  | 0.90506386  | 2.16781081  | 2.37792696  |
| 1  | -1.86792918 | 1.81400365  | 0.79951003  |
| 1  | -1.63372034 | -0.35975084 | 1.74788551  |
| 1  | -0.15276275 | 3.43076091  | 0.99608701  |
| 42 | -0.81164923 | -0.17237126 | -1.00909411 |
| 15 | -1.87067128 | 1.60795052  | -2.27192487 |
| 15 | -1.45007730 | -2.54406527 | -0.50130814 |
| 15 | 1.69746549  | -0.70076431 | -0.96182091 |
| 6  | -1.02114098 | -3.81507785 | -1.79756972 |
| 6  | -0.92693500 | -3.46064930 | 1.04682122  |
| 6  | -3.28760897 | -2.81101809 | -0.37840566 |
| 6  | -1.43171319 | 3.39119198  | -1.96122335 |
| 6  | -1.59488730 | 1.51993563  | -4.11137875 |
| 6  | -3.72934398 | 1.71685908  | -2.20884809 |
| 1  | -1.34568124 | -4.47819983 | 1.06291020  |
| 1  | 0.16688567  | -3.52300114 | 1.10586185  |
| 1  | -1.29741721 | -2.91406920 | 1.92573742  |
| 1  | -1.44395200 | -4.80100008 | -1.55310949 |
| 1  | -1.41592649 | -3.46659449 | -2.76093587 |
| 1  | 0.06987007  | -3.89926487 | -1.89121360 |
| 1  | -3.52779457 | -3.87521358 | -0.23341109 |
| 1  | -3.67570772 | -2.22145993 | 0.46239449  |
| 1  | -3.75532670 | -2.44031954 | -1.29920371 |
| 1  | -4.11055765 | 2.51333522  | -2.86548261 |
| 1  | -4.14565939 | 0.74803574  | -2.51408646 |
| 1  | -4.03710771 | 1.91035826  | -1.17261438 |
| 1  | -1.96131651 | 4.04980506  | -2.66561379 |
| 1  | -1.70713190 | 3.66476781  | -0.93464979 |
| 1  | -0.34763512 | 3.51982105  | -2.07699687 |
| 1  | -2.12682752 | 2.32795989  | -4.63556422 |
| 1  | -0.51735062 | 1.59214924  | -4.30936540 |
| 1  | -1.94434082 | 0.54422975  | -4.47295189 |
| 6  | 2.36059391  | -2.25070216 | -0.14902731 |
| 6  | 2.43477626  | -0.90762081 | -2.65867890 |
| 6  | 2.91804156  | 0.52013190  | -0.25656609 |
| 1  | 3.52348859  | -1.05681360 | -2.60006447 |
| 1  | 1.96427534  | -1.76637341 | -3.15408055 |
| 1  | 2.21007980  | -0.00961911 | -3.24859081 |
| 1  | 3.94233726  | 0.13888500  | -0.38296363 |
| 1  | 2.81792541  | 1.47256222  | -0.79478793 |

|   |             |             |             |
|---|-------------|-------------|-------------|
| 1 | 2.72436545  | 0.69044253  | 0.80906340  |
| 1 | 3.44553398  | -2.33578492 | -0.31053096 |
| 1 | 2.16349231  | -2.19902107 | 0.92990579  |
| 1 | 1.86938805  | -3.14021933 | -0.56559721 |
| 6 | 1.70867613  | 0.56690761  | 4.03923333  |
| 6 | 2.27398489  | 1.60858213  | 4.77798720  |
| 1 | 1.79425648  | -0.46496108 | 4.39198096  |
| 1 | 2.80458117  | 1.38376902  | 5.70529084  |
| 6 | 2.14518923  | 2.93452288  | 4.34187483  |
| 1 | 2.57473367  | 3.75206998  | 4.92236605  |
| 6 | 1.45990827  | 3.19734008  | 3.14867959  |
| 1 | 1.36439622  | 4.22739241  | 2.79376124  |
| 1 | 0.44751403  | -1.09346156 | 2.54125537  |
| 1 | -0.23312429 | -0.83592282 | -2.50969079 |
| 1 | 1.02752429  | 2.36875214  | 0.25041794  |
| 1 | 0.28203299  | 1.01279322  | -1.70877745 |
| 1 | -2.46181466 | -0.13335127 | -0.46904217 |
| 1 | -1.86881018 | -0.84405412 | -2.17183004 |

63

XYZ file for : **TS6-N**

|    |             |             |             |
|----|-------------|-------------|-------------|
| 6  | 0.23610122  | 2.38577206  | 0.99165759  |
| 6  | -0.95265562 | 1.43549408  | 0.85594023  |
| 6  | -1.04978402 | 0.34949578  | 1.74028374  |
| 7  | -0.08513442 | 0.17595276  | 2.74126645  |
| 6  | 0.68165108  | 1.25141642  | 3.20240487  |
| 6  | 0.81842871  | 2.39904683  | 2.39327018  |
| 1  | -1.90693409 | 1.85946387  | 0.54886839  |
| 1  | -2.03084575 | -0.06890908 | 1.95256880  |
| 1  | -0.07178937 | 3.40616769  | 0.71496927  |
| 42 | -0.90638021 | -0.44692687 | -0.76139851 |
| 15 | -1.45838952 | 1.37271447  | -2.35891783 |
| 15 | -1.31272755 | -2.80910564 | -0.66382043 |
| 15 | 1.59210218  | -0.51544271 | -0.87802508 |
| 6  | -1.15630447 | -3.78889220 | -2.24631683 |
| 6  | -0.37787961 | -3.94006633 | 0.50091711  |
| 6  | -3.05178544 | -3.28972406 | -0.17300765 |
| 6  | -0.60231962 | 3.04029975  | -2.42656186 |
| 6  | -1.34829478 | 0.91272425  | -4.16146168 |
| 6  | -3.22945505 | 1.96595191  | -2.28560376 |
| 1  | -0.71076149 | -4.98403156 | 0.39657221  |
| 1  | 0.70021287  | -3.88114776 | 0.30224062  |
| 1  | -0.55294281 | -3.60456517 | 1.53265594  |
| 1  | -1.46379580 | -4.83539050 | -2.09967871 |
| 1  | -1.78960919 | -3.31705958 | -3.00894962 |
| 1  | -0.11613304 | -3.75506587 | -2.59496479 |

1 -3.19104496 -4.38177000 -0.17897457  
1 -3.25778365 -2.89223981 0.82972000  
1 -3.75077106 -2.81437980 -0.87296943  
1 -3.44150788 2.72362850 -3.05545658  
1 -3.88594129 1.09635262 -2.41753257  
1 -3.43079311 2.38867942 -1.29145667  
1 -1.01849813 3.66006369 -3.23545841  
1 -0.73662153 3.56774663 -1.47298686  
1 0.47295921 2.89840645 -2.59708698  
1 -1.72596905 1.72208229 -4.80423633  
1 -0.30121769 0.69763721 -4.41262755  
1 -1.93390533 -0.00074333 -4.32631559  
6 2.34632980 -2.02243068 -1.69422471  
6 2.54658238 0.76806237 -1.87179792  
6 2.64533395 -0.49838622 0.67657064  
1 3.62690998 0.55483083 -1.89137232  
1 2.15768070 0.76815344 -2.90009837  
1 2.38866113 1.76804999 -1.44387676  
1 3.70892976 -0.64534442 0.43437734  
1 2.53288825 0.45398220 1.21106300  
1 2.30726969 -1.30420273 1.34287689  
1 3.44464232 -1.95308679 -1.71907692  
1 2.05672075 -2.92812718 -1.14557654  
1 1.95991254 -2.10038824 -2.71928026  
6 1.30201695 1.19880269 4.46505035  
6 2.03909102 2.28886515 4.93150847  
1 1.19514710 0.30279789 5.08205087  
1 2.51607534 2.23493081 5.91157766  
6 2.15458759 3.44726378 4.15184619  
1 2.72250050 4.30422042 4.51581456  
6 1.53959605 3.49030018 2.89491198  
1 1.63554235 4.38524943 2.27430863  
1 -0.22437491 -0.59274166 3.38741904  
1 -2.05643223 -0.93681058 -1.92482261  
1 1.03402211 2.11747751 0.27868433  
1 -0.20838869 -0.96962517 -2.25522248  
1 -2.59736775 -0.33303926 -0.28921062  
1 -0.78687550 -1.19836682 0.83469748

63

XYZ file for : **9-N**

6 0.52679173 2.19572721 0.95453177  
6 -0.69795615 1.29442320 0.74605071  
6 -0.74950753 0.13192611 1.69018656  
7 0.35277617 0.07659230 2.65441801  
6 0.72462106 1.29217975 3.25389541

|    |             |             |             |
|----|-------------|-------------|-------------|
| 6  | 0.80493790  | 2.43002994  | 2.42211310  |
| 1  | -1.62410130 | 1.87346881  | 0.79586068  |
| 1  | -1.73300822 | 0.03785656  | 2.17428056  |
| 1  | 0.39306389  | 3.15653089  | 0.43705409  |
| 42 | -0.84979205 | -0.42774733 | -0.76107603 |
| 15 | -1.40665307 | 1.39781797  | -2.28167456 |
| 15 | -1.36771508 | -2.81464659 | -0.62937992 |
| 15 | 1.64148272  | -0.62275366 | -1.07519957 |
| 6  | -1.27308861 | -3.79990511 | -2.20734735 |
| 6  | -0.43884863 | -3.95111365 | 0.53819100  |
| 6  | -3.11305519 | -3.23074612 | -0.10249127 |
| 6  | -0.38263255 | 2.95126236  | -2.49413474 |
| 6  | -1.60356542 | 0.93252240  | -4.07499271 |
| 6  | -3.07035511 | 2.18090805  | -1.96097474 |
| 1  | -0.82951458 | -4.97950300 | 0.49482651  |
| 1  | 0.62882686  | -3.95469876 | 0.28082839  |
| 1  | -0.54176559 | -3.57485640 | 1.56627976  |
| 1  | -1.61831741 | -4.83260310 | -2.04783222 |
| 1  | -1.90457061 | -3.30760768 | -2.95831492 |
| 1  | -0.24083461 | -3.80621284 | -2.57830827 |
| 1  | -3.29405126 | -4.31657246 | -0.09403972 |
| 1  | -3.28967567 | -2.81635364 | 0.89934045  |
| 1  | -3.80782583 | -2.73751654 | -0.79471673 |
| 1  | -3.29956936 | 2.96379369  | -2.69978890 |
| 1  | -3.83333913 | 1.39286697  | -1.99502951 |
| 1  | -3.07652561 | 2.61513620  | -0.95223261 |
| 1  | -0.83518690 | 3.61045725  | -3.25060845 |
| 1  | -0.32466668 | 3.49093478  | -1.54062325 |
| 1  | 0.63537857  | 2.68692635  | -2.80719764 |
| 1  | -1.96752927 | 1.78321503  | -4.67019380 |
| 1  | -0.63368562 | 0.59585631  | -4.46510845 |
| 1  | -2.31092954 | 0.09639341  | -4.14713556 |
| 6  | 2.21561573  | -2.07097711 | -2.11101699 |
| 6  | 2.64155349  | 0.70236313  | -1.96309931 |
| 6  | 2.77195793  | -0.89575466 | 0.39891150  |
| 1  | 3.70605702  | 0.43013579  | -2.03571970 |
| 1  | 2.23090738  | 0.82347652  | -2.97579429 |
| 1  | 2.55023478  | 1.66140439  | -1.43551854 |
| 1  | 3.81480030  | -1.02986381 | 0.07304096  |
| 1  | 2.71323887  | -0.05129979 | 1.09684934  |
| 1  | 2.44018685  | -1.79506105 | 0.93683838  |
| 1  | 3.31116586  | -2.07405315 | -2.21779718 |
| 1  | 1.89888628  | -3.00950156 | -1.63645353 |
| 1  | 1.74803076  | -2.00973438 | -3.10267607 |
| 6  | 1.06048961  | 1.38973979  | 4.61568064  |
| 6  | 1.45988597  | 2.61960506  | 5.14988722  |

|   |             |             |             |
|---|-------------|-------------|-------------|
| 1 | 1.00387992  | 0.50446494  | 5.25503881  |
| 1 | 1.71737439  | 2.68655066  | 6.20852475  |
| 6 | 1.51021559  | 3.76076346  | 4.33965654  |
| 1 | 1.80712084  | 4.72243436  | 4.76037201  |
| 6 | 1.18015999  | 3.65607593  | 2.98075780  |
| 1 | 1.23299040  | 4.53796638  | 2.33666460  |
| 1 | 0.24476449  | -0.67914819 | 3.32855463  |
| 1 | -2.14512672 | -0.83856469 | -1.78740674 |
| 1 | 1.42234367  | 1.72686345  | 0.51293128  |
| 1 | -0.35299308 | -0.95142012 | -2.33086232 |
| 1 | -2.48073271 | -0.21044987 | -0.17122859 |
| 1 | -0.67762661 | -0.92017017 | 1.12918245  |

65

XYZ file for : **10-N**

|    |             |             |             |
|----|-------------|-------------|-------------|
| 6  | 0.73643129  | 2.49137578  | 1.44171516  |
| 6  | -0.43319976 | 1.82105348  | 0.70067609  |
| 6  | -1.25976695 | 0.89743594  | 1.54019950  |
| 7  | -0.79077550 | 0.68311483  | 2.91348957  |
| 6  | 0.57725299  | 0.71774187  | 3.19496307  |
| 6  | 1.39687335  | 1.62096092  | 2.48006700  |
| 1  | -1.06108719 | 2.62566833  | 0.29585605  |
| 1  | -2.32490704 | 1.16290694  | 1.58078712  |
| 1  | 0.33997570  | 3.38657206  | 1.96811586  |
| 42 | -0.52163130 | 0.01322777  | -0.69711655 |
| 15 | -2.06713646 | 1.43281107  | -1.88933962 |
| 15 | -0.93217024 | -2.45821298 | -0.53742080 |
| 15 | 1.94005159  | -0.45503266 | -0.55677057 |
| 6  | 0.28216444  | -3.75689154 | 0.04906475  |
| 6  | -2.34706245 | -2.91645995 | 0.59723474  |
| 6  | -1.49596615 | -3.24786728 | -2.12399963 |
| 6  | -1.40732844 | 3.04799964  | -2.55688902 |
| 6  | -2.81564777 | 0.73533030  | -3.44422381 |
| 6  | -3.61971605 | 2.05063428  | -1.04021138 |
| 1  | -2.56181550 | -3.99426529 | 0.54564561  |
| 1  | -2.08122142 | -2.65553766 | 1.63151923  |
| 1  | -3.24021427 | -2.34658147 | 0.31075576  |
| 1  | -0.18185916 | -4.75299884 | -0.00483804 |
| 1  | 1.18919426  | -3.75515151 | -0.56800636 |
| 1  | 0.56344492  | -3.54854399 | 1.08980663  |
| 1  | -1.78895782 | -4.29599267 | -1.96079043 |
| 1  | -2.34380674 | -2.67511230 | -2.51967001 |
| 1  | -0.67832751 | -3.19456478 | -2.85411200 |
| 1  | -4.21139973 | 2.70104445  | -1.70189083 |
| 1  | -4.22518237 | 1.18431750  | -0.73954637 |
| 1  | -3.35094269 | 2.61847823  | -0.13767726 |

|   |             |             |             |
|---|-------------|-------------|-------------|
| 1 | -2.19619200 | 3.63315965  | -3.05291518 |
| 1 | -0.97551065 | 3.63682334  | -1.73663804 |
| 1 | -0.60704370 | 2.81911528  | -3.27292835 |
| 1 | -3.44864168 | 1.47889929  | -3.95105227 |
| 1 | -2.00107566 | 0.41917437  | -4.10857687 |
| 1 | -3.41649124 | -0.14766266 | -3.18824290 |
| 6 | 2.87282142  | -1.37538181 | 0.78805589  |
| 6 | 2.52626917  | -1.42743201 | -2.04919853 |
| 6 | 3.10354687  | 0.99114910  | -0.76076719 |
| 1 | 3.61569074  | -1.58554439 | -2.02477304 |
| 1 | 2.01760719  | -2.39889485 | -2.09911882 |
| 1 | 2.24753747  | -0.86094890 | -2.94723813 |
| 1 | 4.13130527  | 0.62744364  | -0.90892552 |
| 1 | 2.78698615  | 1.57658403  | -1.63330312 |
| 1 | 3.07835897  | 1.62987316  | 0.12803514  |
| 1 | 3.94000757  | -1.46255637 | 0.53130413  |
| 1 | 2.76871581  | -0.83044347 | 1.73455323  |
| 1 | 2.45830526  | -2.38185430 | 0.91968089  |
| 6 | 1.13040529  | -0.06175795 | 4.22980750  |
| 6 | 2.47776617  | 0.07402069  | 4.57653987  |
| 1 | 0.49394145  | -0.76738667 | 4.77112938  |
| 1 | 2.89022534  | -0.53464950 | 5.38333166  |
| 6 | 3.29403253  | 0.97868073  | 3.88623657  |
| 1 | 4.34637237  | 1.08827434  | 4.15119294  |
| 6 | 2.74287567  | 1.73943899  | 2.84540485  |
| 1 | 3.37192420  | 2.45508158  | 2.30865512  |
| 1 | -1.27342032 | -0.07975713 | 3.38542662  |
| 1 | -0.32430895 | -0.56550319 | -2.31847273 |
| 1 | 1.48043689  | 2.87937296  | 0.72978508  |
| 1 | 0.44204646  | 1.01828389  | -1.70665676 |
| 1 | -1.27745249 | -0.19914383 | 1.06987632  |
| 1 | -2.13736927 | -0.58653499 | -1.03587218 |
| 1 | 2.19077756  | 5.04094556  | -2.01678378 |
| 1 | 1.89139213  | 4.37216845  | -1.84770577 |

65

XYZ file for : **TS7-N**

|   |             |             |            |
|---|-------------|-------------|------------|
| 6 | 0.97851515  | 1.48069423  | 2.15416118 |
| 6 | -0.31421321 | 1.22450196  | 1.34955864 |
| 6 | -1.38427120 | 0.87014705  | 2.39146906 |
| 7 | -1.02752765 | -0.36480633 | 3.10617623 |
| 6 | 0.26670457  | -0.47165527 | 3.62193665 |
| 6 | 1.29357565  | 0.38909178  | 3.16255092 |
| 1 | -0.64858169 | 2.20874613  | 0.94010008 |
| 1 | -1.49591944 | 1.70353351  | 3.12485479 |
| 1 | 0.87424828  | 2.43328596  | 2.71801190 |

|    |             |             |             |
|----|-------------|-------------|-------------|
| 42 | -0.40869285 | 0.62647586  | -0.87249452 |
| 15 | -2.20682261 | 0.93568825  | -2.43085681 |
| 15 | -0.84221263 | -1.71144324 | -0.44202466 |
| 15 | 2.13541492  | 0.55966219  | -1.03585869 |
| 6  | 0.43169097  | -2.73042797 | 0.47221165  |
| 6  | -2.35262908 | -2.15392451 | 0.56214221  |
| 6  | -1.09276761 | -2.83921255 | -1.90829231 |
| 6  | -1.89280774 | 0.59518570  | -4.24288503 |
| 6  | -3.84020669 | 0.04762929  | -2.23453868 |
| 6  | -2.86150103 | 2.68664196  | -2.55893484 |
| 1  | -2.47367151 | -3.24650128 | 0.61634012  |
| 1  | -2.21089850 | -1.74896974 | 1.57258014  |
| 1  | -3.24481519 | -1.70186282 | 0.11147675  |
| 1  | 0.05169159  | -3.74411904 | 0.67203634  |
| 1  | 1.33786433  | -2.80396241 | -0.14380565 |
| 1  | 0.68344385  | -2.23545387 | 1.41840736  |
| 1  | -1.31346748 | -3.86594881 | -1.58016389 |
| 1  | -1.91997041 | -2.47155791 | -2.52958851 |
| 1  | -0.17989067 | -2.83670205 | -2.51892969 |
| 1  | -3.70177327 | 2.75179886  | -3.26685932 |
| 1  | -3.19226118 | 3.01770720  | -1.56511454 |
| 1  | -2.05307226 | 3.34859199  | -2.89873005 |
| 1  | -2.78146695 | 0.81069445  | -4.85507988 |
| 1  | -1.05177579 | 1.21795106  | -4.57504484 |
| 1  | -1.60672285 | -0.45793325 | -4.36692255 |
| 1  | -4.54151563 | 0.33727568  | -3.03134872 |
| 1  | -3.68854511 | -1.03933802 | -2.27259287 |
| 1  | -4.26775169 | 0.30454644  | -1.25626053 |
| 6  | 3.28495970  | -0.41536565 | 0.07424080  |
| 6  | 2.73787612  | -0.07918828 | -2.68118453 |
| 6  | 3.01188391  | 2.21752044  | -1.04311750 |
| 1  | 3.83408785  | -0.01492407 | -2.75079759 |
| 1  | 2.42338614  | -1.12511937 | -2.79477870 |
| 1  | 2.27559180  | 0.50813254  | -3.48442383 |
| 1  | 4.08799114  | 2.09740844  | -1.23924412 |
| 1  | 2.56431351  | 2.83982451  | -1.83019878 |
| 1  | 2.87743577  | 2.72913594  | -0.08035439 |
| 1  | 4.33493015  | -0.15898747 | -0.13307027 |
| 1  | 3.06303804  | -0.23702541 | 1.13303362  |
| 1  | 3.13762975  | -1.48556541 | -0.12237917 |
| 6  | 0.57062168  | -1.46441516 | 4.57880249  |
| 6  | 1.86394173  | -1.60179308 | 5.08411374  |
| 1  | -0.22453023 | -2.13271342 | 4.92109738  |
| 1  | 2.07317921  | -2.37525364 | 5.82565481  |
| 6  | 2.88567573  | -0.75116517 | 4.64119184  |
| 1  | 3.89942415  | -0.84962088 | 5.03137653  |



|   |             |             |             |
|---|-------------|-------------|-------------|
| 6 | 2.58432225  | 0.22880538  | 3.68770244  |
| 1 | 3.37337050  | 0.90331049  | 3.34138356  |
| 1 | -1.74017434 | -0.67994334 | 3.76088127  |
| 1 | 0.01816055  | -0.46893136 | -2.11820196 |
| 1 | 1.85343532  | 1.63096853  | 1.50511116  |
| 1 | 0.20089945  | 1.33409441  | -2.34368938 |
| 1 | -2.35933798 | 0.71377162  | 1.91105215  |
| 1 | -2.03160786 | 0.77212036  | -0.24798811 |
| 1 | 0.19387785  | 3.48025403  | -0.73164729 |
| 1 | -0.25178572 | 3.25863638  | -1.30225470 |

65

XYZ file for : **11-N**

|    |             |             |             |
|----|-------------|-------------|-------------|
| 6  | 0.86900826  | 1.64896368  | 2.25203268  |
| 6  | -0.42893261 | 1.34123048  | 1.46330413  |
| 6  | -1.38436505 | 0.67669991  | 2.46179666  |
| 7  | -0.83088486 | -0.57124813 | 3.01061281  |
| 6  | 0.46834700  | -0.52205229 | 3.52664798  |
| 6  | 1.34458022  | 0.52840135  | 3.16114149  |
| 1  | -0.90348590 | 2.31730242  | 1.28037140  |
| 1  | -1.59231194 | 1.38197846  | 3.30122705  |
| 1  | 0.70076266  | 2.53887024  | 2.89552210  |
| 42 | -0.43846704 | 0.74796824  | -0.88799077 |
| 15 | -2.18807935 | 1.00113130  | -2.54348461 |
| 15 | -0.94533581 | -1.66572507 | -0.38900586 |
| 15 | 2.11073060  | 0.54145532  | -0.93861648 |
| 6  | 0.28628479  | -2.74411802 | 0.50656789  |
| 6  | -2.50706751 | -2.10929442 | 0.53312464  |
| 6  | -1.18524680 | -2.75250109 | -1.89205408 |
| 6  | -1.80325396 | 0.55586458  | -4.31651076 |
| 6  | -3.83887090 | 0.14527284  | -2.35683645 |
| 6  | -2.80165285 | 2.74708930  | -2.78236200 |
| 1  | -2.66641394 | -3.19778498 | 0.51400566  |
| 1  | -2.40816733 | -1.77583754 | 1.57144822  |
| 1  | -3.36397803 | -1.60139355 | 0.07284841  |
| 1  | -0.13530321 | -3.74470365 | 0.68662891  |
| 1  | 1.18422986  | -2.84577218 | -0.11778563 |
| 1  | 0.56124659  | -2.27807883 | 1.45937749  |
| 1  | -1.43207964 | -3.78352298 | -1.59705675 |
| 1  | -1.99060287 | -2.35738033 | -2.52497488 |
| 1  | -0.25860547 | -2.75067962 | -2.48148856 |
| 1  | -3.58662686 | 2.80002550  | -3.55185358 |
| 1  | -3.19637453 | 3.11539285  | -1.82593858 |
| 1  | -1.95446389 | 3.38053417  | -3.07860486 |
| 1  | -2.65842922 | 0.75951400  | -4.97811936 |
| 1  | -0.93364870 | 1.14176856  | -4.64224429 |

|   |             |             |             |
|---|-------------|-------------|-------------|
| 1 | -1.53757949 | -0.50812763 | -4.37456109 |
| 1 | -4.50991115 | 0.40317177  | -3.18979038 |
| 1 | -3.70604816 | -0.94437375 | -2.33244864 |
| 1 | -4.29125231 | 0.46128085  | -1.40744300 |
| 6 | 3.16300121  | -0.47058885 | 0.22670648  |
| 6 | 2.74585815  | -0.14152224 | -2.55435851 |
| 6 | 3.05022215  | 2.15802419  | -0.92861928 |
| 1 | 3.84583257  | -0.12924604 | -2.58195641 |
| 1 | 2.38702388  | -1.17268206 | -2.67294135 |
| 1 | 2.34428335  | 0.45878326  | -3.38050004 |
| 1 | 4.12587457  | 1.99623311  | -1.09524437 |
| 1 | 2.64508966  | 2.79471774  | -1.72719058 |
| 1 | 2.90741926  | 2.67522530  | 0.02962428  |
| 1 | 4.22997788  | -0.25038655 | 0.07109383  |
| 1 | 2.89211695  | -0.27804178 | 1.27143317  |
| 1 | 2.99004621  | -1.53376379 | 0.01669922  |
| 6 | 0.92794276  | -1.54238284 | 4.38833653  |
| 6 | 2.22653774  | -1.52147770 | 4.89834172  |
| 1 | 0.24812947  | -2.35654840 | 4.65584132  |
| 1 | 2.55680446  | -2.31943191 | 5.56624016  |
| 6 | 3.09767083  | -0.47881773 | 4.55460432  |
| 1 | 4.11368804  | -0.45016850 | 4.95049386  |
| 6 | 2.64336383  | 0.52651253  | 3.69317300  |
| 1 | 3.31618386  | 1.34487582  | 3.41884649  |
| 1 | -1.47098591 | -1.05686053 | 3.63655800  |
| 1 | -0.01454485 | -0.36433748 | -2.12312233 |
| 1 | 1.69606420  | 1.93847875  | 1.58587076  |
| 1 | 0.22746449  | 1.37395794  | -2.35577887 |
| 1 | -2.34726859 | 0.44420479  | 1.98613568  |
| 1 | -2.06397971 | 0.96290260  | -0.28234430 |
| 1 | 0.12749756  | 2.47668757  | -0.66486540 |
| 1 | -0.70627603 | 2.55884054  | -0.94928742 |

65

XYZ file for : **TS8-N**

|    |             |             |             |
|----|-------------|-------------|-------------|
| 6  | 0.48653668  | 2.08304625  | 2.43011982  |
| 6  | -0.69724083 | 1.52008367  | 1.61899131  |
| 6  | -1.38468350 | 0.46168635  | 2.48351062  |
| 7  | -0.47468637 | -0.62810095 | 2.83920998  |
| 6  | 0.79385482  | -0.28656031 | 3.31715152  |
| 6  | 1.32795547  | 1.00769829  | 3.09388947  |
| 1  | -1.44460945 | 2.32068394  | 1.50416186  |
| 1  | -1.75298113 | 0.96383152  | 3.40883924  |
| 1  | 0.09147191  | 2.74728192  | 3.22542052  |
| 42 | -0.48008830 | 0.52903417  | -0.85745067 |
| 15 | -2.08043516 | 1.01687550  | -2.56364588 |

|    |             |             |             |
|----|-------------|-------------|-------------|
| 15 | -1.16362753 | -1.84659512 | -0.51294072 |
| 15 | 2.04865508  | 0.25784442  | -0.71280809 |
| 6  | 0.00485320  | -3.09001604 | 0.26259327  |
| 6  | -2.70925538 | -2.25677066 | 0.46867561  |
| 6  | -1.55466812 | -2.82062815 | -2.06129142 |
| 6  | -1.64642564 | 0.59208626  | -4.33240087 |
| 6  | -3.83190459 | 0.36302877  | -2.50653650 |
| 6  | -2.46531173 | 2.83370249  | -2.76616749 |
| 1  | -2.96047043 | -3.32360090 | 0.37135928  |
| 1  | -2.55042229 | -2.02978000 | 1.53021413  |
| 1  | -3.54570251 | -1.64597772 | 0.10369276  |
| 1  | -0.47440979 | -4.07403612 | 0.38313896  |
| 1  | 0.88285153  | -3.19856078 | -0.38907785 |
| 1  | 0.33340236  | -2.70882427 | 1.23756003  |
| 1  | -1.84511236 | -3.85319027 | -1.81510077 |
| 1  | -2.36905676 | -2.34065702 | -2.61898670 |
| 1  | -0.66255811 | -2.83117831 | -2.70146877 |
| 1  | -3.19268850 | 3.00873244  | -3.57353961 |
| 1  | -2.86410403 | 3.21444402  | -1.81645734 |
| 1  | -1.53032943 | 3.36544193  | -2.98666117 |
| 1  | -2.42271080 | 0.93503495  | -5.03290173 |
| 1  | -0.68787129 | 1.06819898  | -4.57817345 |
| 1  | -1.52044033 | -0.49495189 | -4.42435570 |
| 1  | -4.40808768 | 0.70524165  | -3.37936738 |
| 1  | -3.83152200 | -0.73475782 | -2.48701911 |
| 1  | -4.30887181 | 0.72401543  | -1.58549260 |
| 6  | 2.98659313  | -0.91744078 | 0.39606167  |
| 6  | 2.78677726  | -0.23763301 | -2.35168358 |
| 6  | 3.02669176  | 1.82058657  | -0.40546720 |
| 1  | 3.88561471  | -0.25180519 | -2.29586532 |
| 1  | 2.41706523  | -1.23496390 | -2.62374984 |
| 1  | 2.46018702  | 0.47156142  | -3.12257396 |
| 1  | 4.10106868  | 1.65478691  | -0.57614237 |
| 1  | 2.65914314  | 2.60477975  | -1.08079608 |
| 1  | 2.88048289  | 2.15203965  | 0.63045649  |
| 1  | 4.07110256  | -0.79332628 | 0.25575194  |
| 1  | 2.72988263  | -0.73349886 | 1.44575498  |
| 1  | 2.70892800  | -1.94929837 | 0.14565066  |
| 6  | 1.57843824  | -1.25062118 | 3.98737910  |
| 6  | 2.86726227  | -0.94861800 | 4.42864142  |
| 1  | 1.16537267  | -2.25000191 | 4.15067095  |
| 1  | 3.45282689  | -1.71248236 | 4.94356218  |
| 6  | 3.40605350  | 0.32564548  | 4.20532332  |
| 1  | 4.41402406  | 0.56988763  | 4.54239729  |
| 6  | 2.62829084  | 1.28201640  | 3.54242475  |
| 1  | 3.03593453  | 2.28251607  | 3.37035801  |

|   |             |             |             |
|---|-------------|-------------|-------------|
| 1 | -0.91272401 | -1.37265001 | 3.37682307  |
| 1 | 0.01575665  | -0.56751331 | -2.10011248 |
| 1 | 1.12940250  | 2.72854119  | 1.80900989  |
| 1 | 0.29457475  | 1.27548356  | -2.18773296 |
| 1 | -2.25772614 | 0.04501108  | 1.96745914  |
| 1 | -2.13155577 | 0.88682820  | -0.40055608 |
| 1 | -0.24475567 | 1.96638338  | 0.21888181  |
| 1 | -0.31122890 | 2.32448877  | -0.72733453 |

65

XYZ file for : **12-N**

|    |             |             |             |
|----|-------------|-------------|-------------|
| 6  | 0.93938422  | 2.66090155  | 3.15116391  |
| 6  | -0.15985670 | 2.94027546  | 2.11659902  |
| 6  | -1.21329024 | 1.84085256  | 2.13737237  |
| 7  | -0.58393879 | 0.53614164  | 1.77188575  |
| 6  | 0.48841033  | 0.18518697  | 2.66440582  |
| 6  | 1.26011804  | 1.18370200  | 3.29621990  |
| 1  | -0.63649480 | 3.91216828  | 2.31346496  |
| 1  | -1.66542490 | 1.75732703  | 3.14470317  |
| 1  | 0.62695547  | 3.03668666  | 4.14151797  |
| 42 | -0.46808272 | 0.22818671  | -0.74172105 |
| 15 | -2.10088893 | 0.69060575  | -2.41934665 |
| 15 | -0.91075624 | -2.21267355 | -0.50622824 |
| 15 | 2.04878135  | 0.37237458  | -0.76637416 |
| 6  | 0.48539027  | -3.43379265 | -0.17823122 |
| 6  | -2.15597040 | -2.83125076 | 0.76637866  |
| 6  | -1.61134993 | -3.10539698 | -1.99604228 |
| 6  | -1.72990122 | 0.22591086  | -4.19346874 |
| 6  | -3.86143881 | 0.06822715  | -2.29662062 |
| 6  | -2.46956020 | 2.50723358  | -2.65058296 |
| 1  | -2.27886629 | -3.92409360 | 0.71808196  |
| 1  | -1.84878164 | -2.56442446 | 1.78855092  |
| 1  | -3.12122707 | -2.34515700 | 0.56625660  |
| 1  | 0.12771881  | -4.47421914 | -0.12483541 |
| 1  | 1.20864756  | -3.34245489 | -1.00146870 |
| 1  | 1.00482322  | -3.17735477 | 0.75459616  |
| 1  | -1.74560452 | -4.17815002 | -1.78910239 |
| 1  | -2.57810499 | -2.66978033 | -2.27733465 |
| 1  | -0.91580481 | -2.97884338 | -2.83642891 |
| 1  | -3.21843310 | 2.67226307  | -3.44043691 |
| 1  | -2.83134122 | 2.91205594  | -1.69667798 |
| 1  | -1.53344271 | 3.02113076  | -2.90387396 |
| 1  | -2.51284897 | 0.58650626  | -4.87773559 |
| 1  | -0.76277737 | 0.66506258  | -4.47249799 |
| 1  | -1.64670566 | -0.86598244 | -4.27457481 |
| 1  | -4.45373268 | 0.38998229  | -3.16665290 |

1 -3.87928291 -1.02734231 -2.23398248  
1 -4.30569178 0.47134054 -1.37698623  
6 3.21148044 -0.56110083 0.36732193  
6 2.80228180 -0.10143737 -2.40520368  
6 2.77640270 2.08432052 -0.57331214  
1 3.88776908 0.07941483 -2.40839906  
1 2.60337040 -1.16396462 -2.59697234  
1 2.32361274 0.48558482 -3.19937894  
1 3.86151600 2.09076652 -0.75921701  
1 2.26693296 2.75826386 -1.27437547  
1 2.58453007 2.44413391 0.44667511  
1 4.25914062 -0.32663349 0.12316559  
1 3.01728062 -0.29385284 1.41334593  
1 3.04532027 -1.64021126 0.24941573  
6 0.75669118 -1.17026517 2.92503673  
6 1.79962467 -1.54949084 3.76930227  
1 0.14074620 -1.93286311 2.44689418  
1 1.98962628 -2.60814648 3.95351931  
6 2.60041828 -0.56770348 4.36838279  
1 3.42851569 -0.84934137 5.02013221  
6 2.31834844 0.77849712 4.13017072  
1 2.92389718 1.55122744 4.61148997  
1 -1.30426036 -0.18806649 1.81509967  
1 0.04264690 -0.78179096 -2.04209480  
1 1.85686511 3.21756887 2.89855194  
1 0.15889578 1.09052047 -2.07233466  
1 -1.99712631 2.03263489 1.39684844  
1 -2.13910233 0.44294422 -0.21593065  
1 0.24796050 2.97093757 1.09487613  
1 -0.45402093 1.97484906 -0.59300337

44

XYZ file for : 13

42 -0.30291559 0.08881096 -0.99563048  
15 -2.29359186 0.90567196 -2.03663203  
15 -0.75501998 -2.32760017 -0.75901256  
15 2.13251548 0.16409998 -1.34486427  
6 -0.49905633 -2.88899217 1.01407207  
6 -2.43591862 -3.09822044 -1.06644824  
6 0.28922116 -3.59201668 -1.65693281  
6 -2.33139805 0.99603329 -3.90027770  
6 -3.96352122 0.12110465 -1.74158260  
6 -2.69379772 2.67257123 -1.60422431  
1 -2.44303943 -4.16928542 -0.81165251  
1 -3.18655914 -2.57121549 -0.46333525  
1 -2.69269175 -2.97976254 -2.12850238

1 -0.68134789 -3.96939377 1.11778625  
1 0.53040059 -2.66910153 1.33079946  
1 -1.18925074 -2.34007745 1.66921954  
1 -0.02373034 -4.62199478 -1.42606548  
1 0.20569407 -3.41606864 -2.73805635  
1 1.34016408 -3.45773926 -1.36742112  
1 -3.59551360 3.02150870 -2.13032977  
1 -2.83648610 2.73945246 -0.51817496  
1 -1.83207542 3.29669667 -1.87238703  
1 -3.26401974 1.45423188 -4.26181592  
1 -1.47133800 1.58641978 -4.24265328  
1 -2.23631940 -0.01950219 -4.30767364  
1 -4.75593591 0.70455972 -2.23459976  
1 -3.97028592 -0.90037862 -2.14229330  
1 -4.15212704 0.07932962 -0.66102303  
6 3.08440635 -0.27171228 0.20861523  
6 3.02334110 -0.87384147 -2.61705178  
6 2.87774204 1.82872021 -1.73592557  
1 4.10595721 -0.67397265 -2.62067450  
1 2.84431801 -1.93757363 -2.41471717  
1 2.60407822 -0.63902120 -3.60508730  
1 3.97744654 1.79178768 -1.76402409  
1 2.49493640 2.16123410 -2.71042355  
1 2.53838384 2.54508075 -0.97681908  
1 4.16198984 -0.09879481 0.06789216  
1 2.72840251 0.35260084 1.04016891  
1 2.91947383 -1.32778516 0.46218805  
1 -0.27682486 -0.62494416 -2.55656033  
1 -0.00127756 1.19528313 -2.25176378  
1 -1.71550784 0.28567800 0.03286940  
1 -0.07608688 1.73988766 -0.44661408

21

XYZ file for : 14

6 0.86092629 2.64643096 3.24635230  
6 -0.09440030 2.89576483 2.06926967  
6 -1.24102859 1.88167476 2.10489578  
7 -0.68965663 0.53384206 1.99681051  
6 0.40473603 0.18192359 2.79273616  
6 1.21795852 1.17665456 3.39081372  
1 -0.49880042 3.91827214 2.10786119  
1 -1.82232781 2.01869041 3.04045263  
1 0.38684546 3.00156502 4.17903755  
6 0.74352925 -1.17798901 2.96217162  
6 1.86327483 -1.55040379 3.70541833  
1 0.11857230 -1.94348463 2.49409788

|   |             |             |            |
|---|-------------|-------------|------------|
| 1 | 2.10209222  | -2.60904629 | 3.82311664 |
| 6 | 2.67712920  | -0.57219529 | 4.29259327 |
| 1 | 3.55763635  | -0.85522831 | 4.87037103 |
| 6 | 2.34389028  | 0.77584272  | 4.12336618 |
| 1 | 2.97168616  | 1.54881358  | 4.57575816 |
| 1 | -1.37948845 | -0.20447859 | 1.89221126 |
| 1 | 1.77920896  | 3.24271281  | 3.12573647 |
| 1 | -1.92823363 | 2.04188144  | 1.26046927 |
| 1 | 0.44362448  | 2.78698691  | 1.11409749 |
